# Supplementary figures and images for: Cryo-EM structure in situ reveals a molecular switch that safeguards virus against genome loss
Source: eLife journal article supplement (doi:10.7554/elife.55517), 2020-04-14

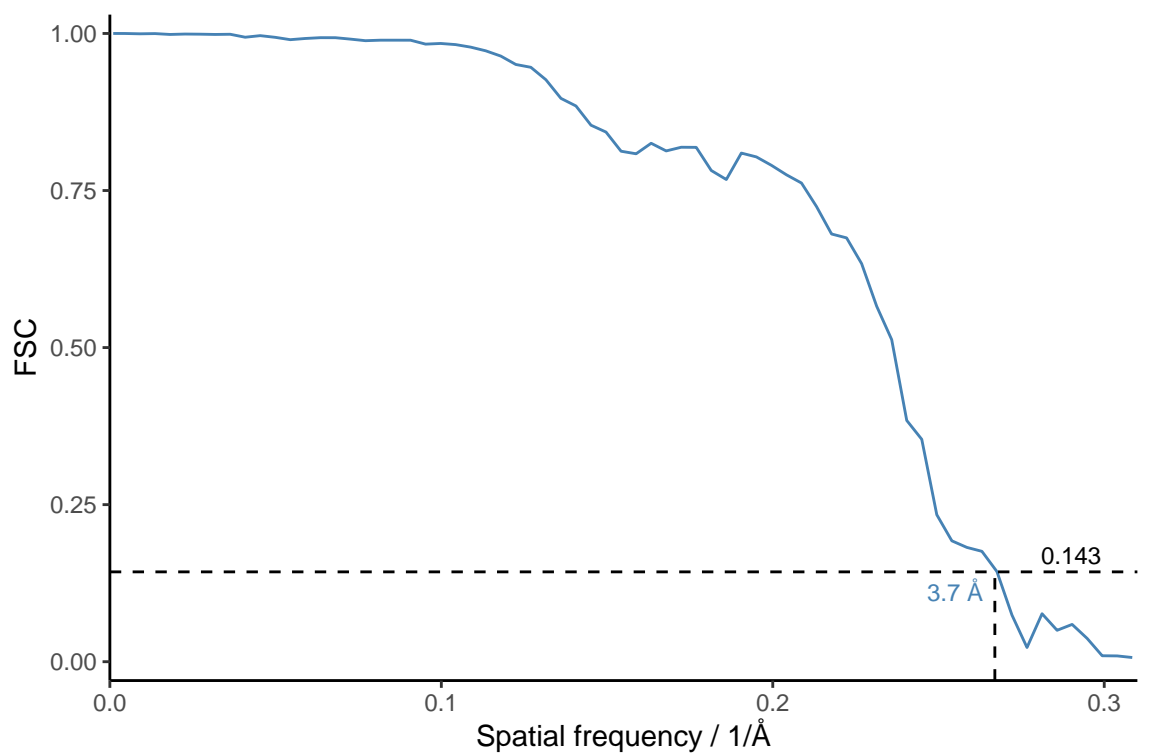

Supplement: supp [file elife-55517-supp-v1.zip]

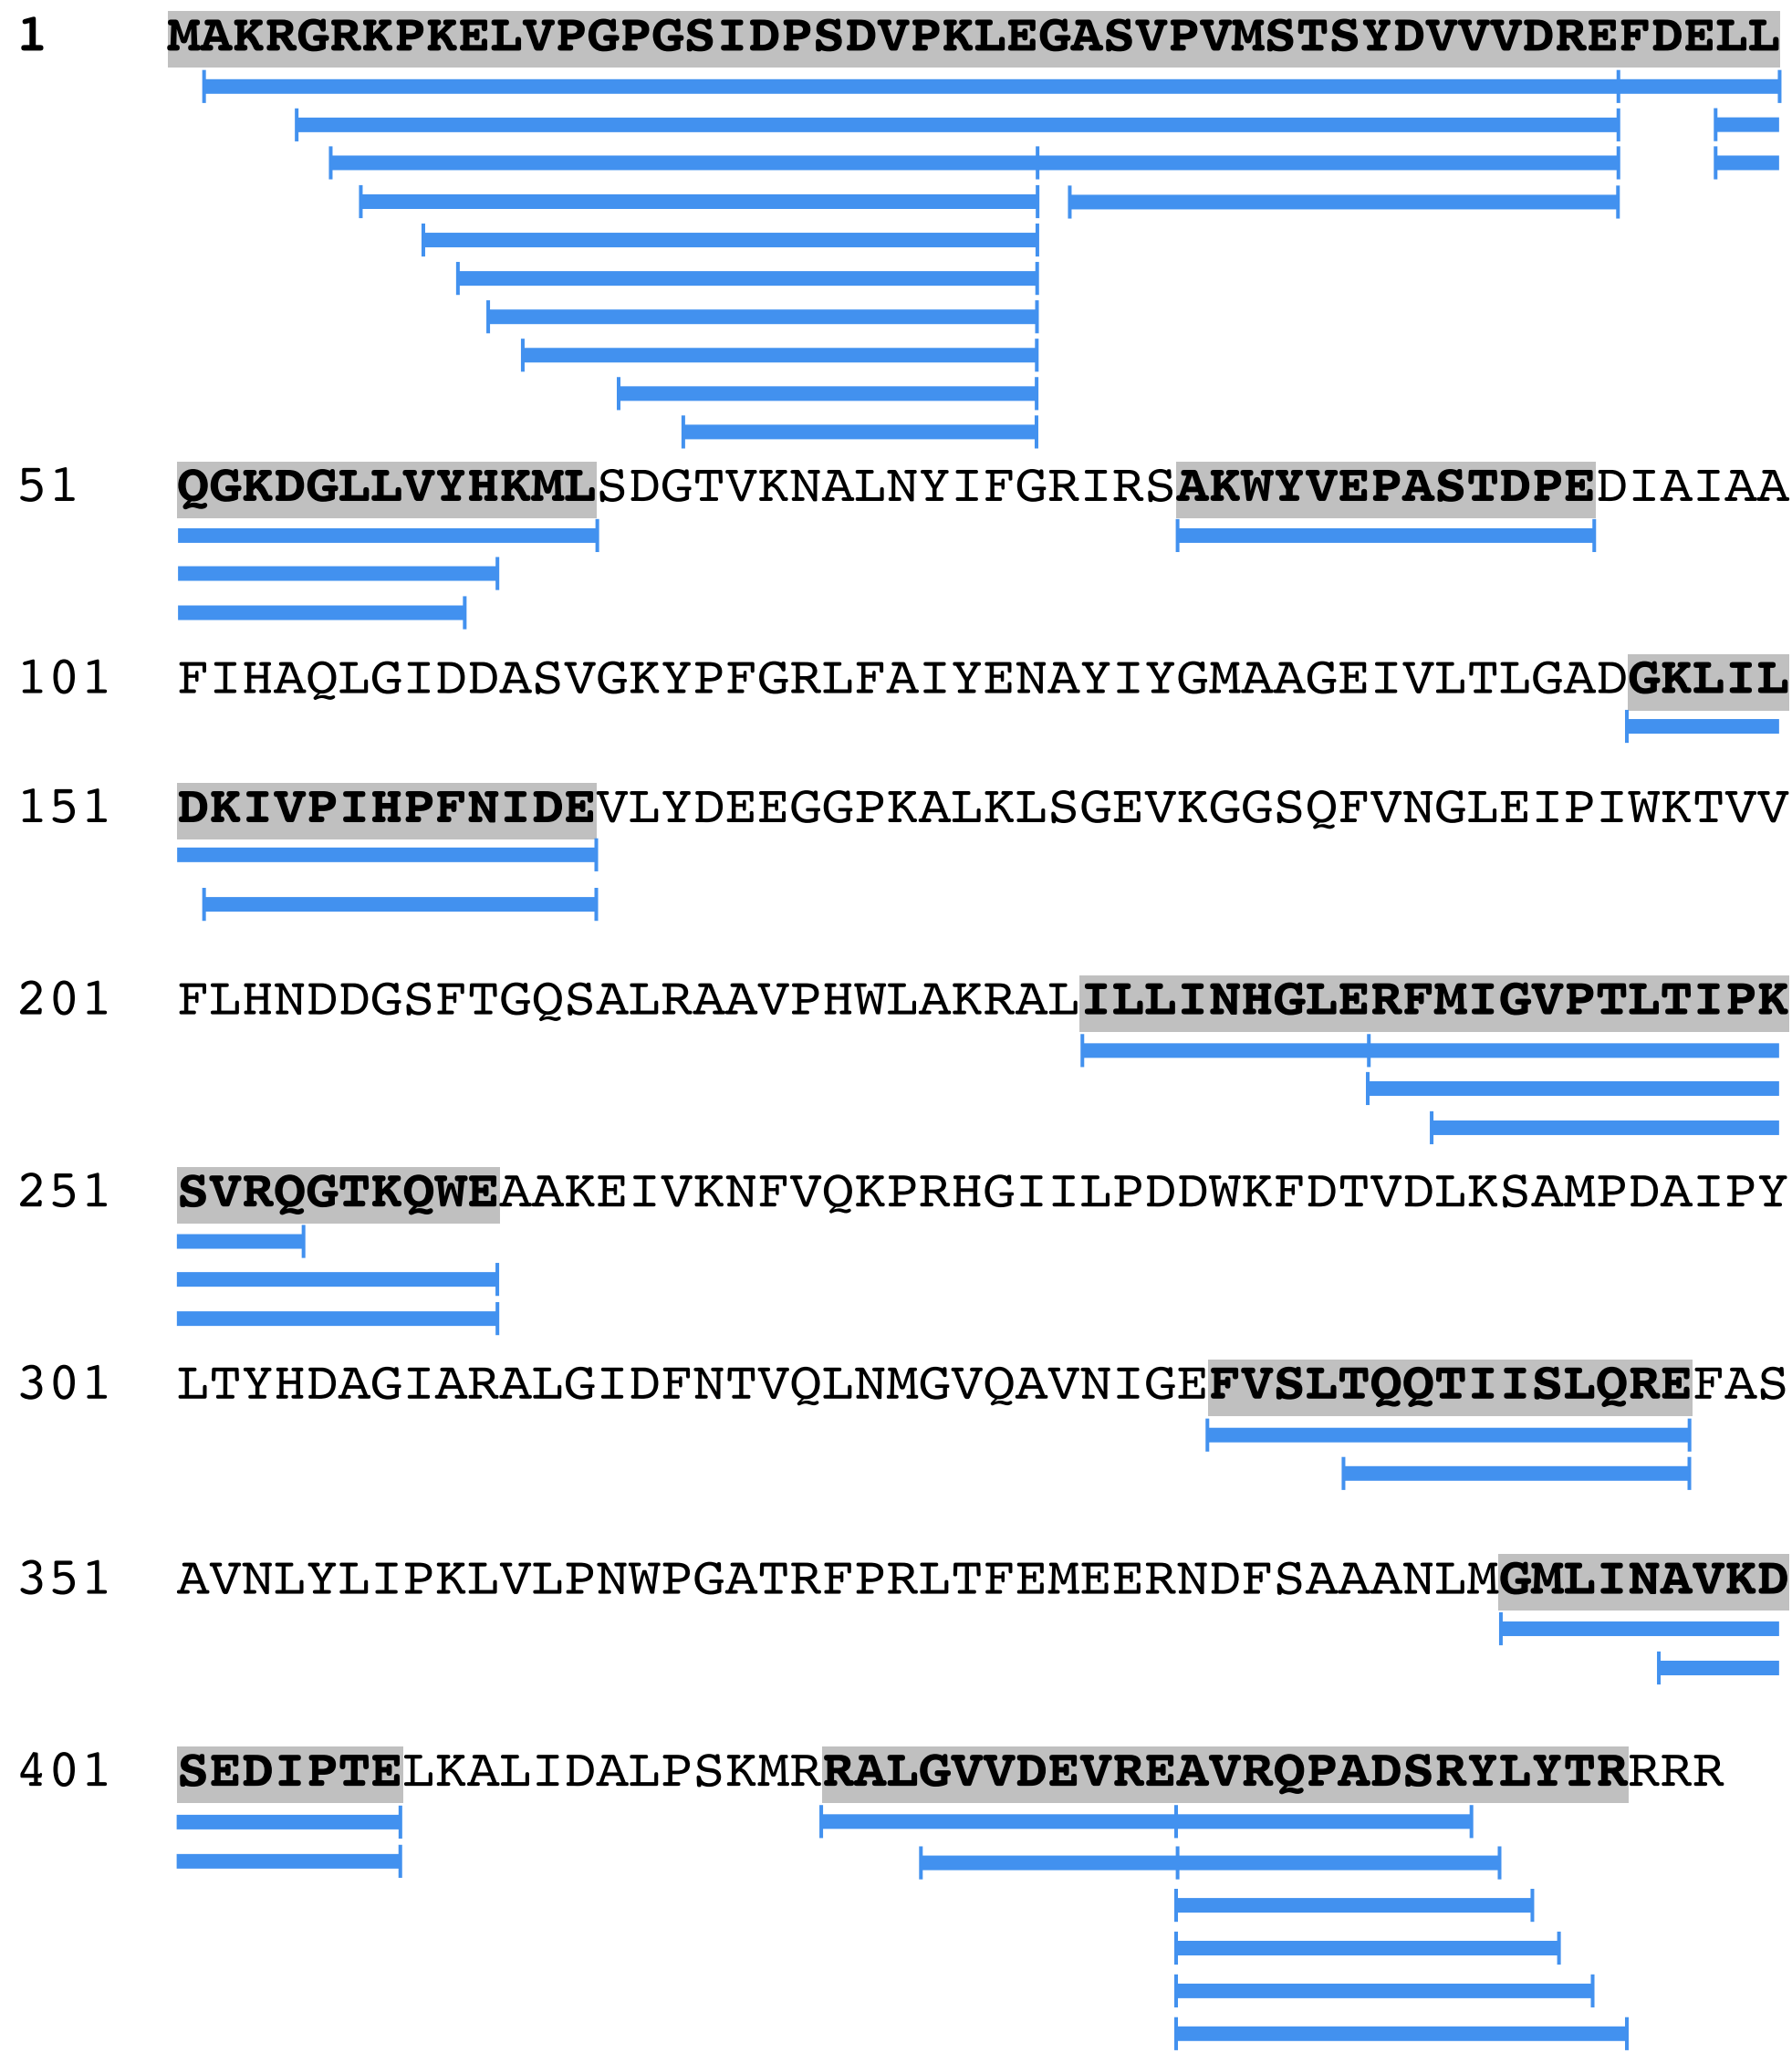

Supplement: supp [file elife-55517-supp-v1.zip]
